# Supplementary material
Source: PubMed Central journal article supplement (PMC3981860)
Supplement: hvi-9-2483-s01.pdf [file hvi-9-2483-s01.pdf]

## **Supplemental Material to:**

**Chupei Zhang, Marientina Gotsis, and Maryalice Jordan-Marsh**

**Social media microblogs as an HPV vaccination forum**

**Human Vaccines & Immunotherapeutics 2013; 9(11)**

**<http://dx.doi.org/10.4161/hv.25599>**

**<http://www.landesbioscience.com/journals/vaccines/article/25599/>**

## **Supplement:**

### **HPV Vaccines Efficiency, Safety & Uptake**

The first cancer vaccine (quadrivalent HPV recombinant) was approved by the Food and Drug Administration (FDA) in 2006.<sup>1,2,4</sup> Currently there are two licensed HPV vaccines: Gardasil (Merck & Co., Whitehouse Station, NJ, USA) and Cervarix (GlaxoSmithKline, USA). Gardasil can protect 11 through 26 year-old females and 9 through 26 year-old males against multiple HPV types and genital warts while Cervarix targets type 16 and 18, recommended for females 10 through 25 years of age.<sup>2</sup> Although HPV is usually sexually transmitted,<sup>1</sup> some research shows that girls can also get infected even without sexual intercourse, thus, vaccination is recommended at a young age.<sup>10</sup>

Both vaccines are three-dose, intramuscular injection vaccines requiring 3 doses. Quadrivalent vaccine efficacy was established in two studies.<sup>4</sup> The Females United to Unilaterally Reduce Endo / Ectocervical Disease (FUTURE I) study assessed the incidence of genital warts, vulvar or cervical intraepithelial neoplasia (CIN) or cancer in a randomized, double-blind, placebo-controlled, international trial. High effectiveness in pre-cancerous prevention was shown in a study

of women aged 16-24 years old.<sup>4</sup> Another clinical trial of quadrivalent HPV vaccine confirmed high efficacy in preventing lower genital tract disease in women up to age 45 years.<sup>5</sup> Bivalent vaccine efficacy prevention against CIN (grade 2-3) was 90% in the mean follow-up period of 14.9 months in a phase III study among 18644 women of the right age and the vaccine efficacy.<sup>3</sup>

Although the vaccine is one of the most effective tools in disease prevention, it's not perfectly safe and effective.<sup>6,7</sup> "As with all US-administered vaccines, HPV vaccines were safety-tested before licensing and are continually monitored for safety and effectiveness."<sup>2</sup> It is necessary to monitor vaccine safety in order to detect rare reactions, to follow higher risk groups (i.e. the elderly and pregnant women etc.) and to maintain public confidence in vaccine.<sup>8</sup> The FDA monitors safety via three integrated elements: the Vaccine Adverse Event Reporting System (VAERS), the Vaccine Safety Datalink (VSD) Project, and the Clinical Immunization Safety Assessment (CISA) network.<sup>4,9</sup> Up to December 31st, 2008, 11,916 VAERS adverse events had been reported from more than 23 million doses of HPV vaccine distributed in the United States.<sup>4</sup> The majority (94%) of the

documented reports are not serious and there is no link between the vaccine and serious adverse events claims, according to CDC evaluation of VAERS data.<sup>4</sup>

Note:

1. CARTER JR, DING Z, ROSE BR. HPV infection and cervical disease:

A review. Aust N Z J Obstet Gynaecol. 2011;51(2):103-8.

2. Human papillomavirus (HPV) vaccine [homepage on the Internet].

2013. Available from:

<http://www.cdc.gov/vaccinesafety/Vaccines/HPV/Index.html>.

3. Luciani S, Prieto-Lara E, Vicari A. Providing vaccines against

human papillomavirus to adolescent girls in the americas:

Battling cervical cancer, improving overall health. Health

Affair. 2011 June 01;30(6):1089-95.

4. Pomfret TC, Gagnon Jr JM, Gilchrist AT. Quadrivalent human

papillomavirus (HPV) vaccine: A review of safety, efficacy, and

pharmacoeconomics. J Clin Pharm Ther. 2011;36(1):1-9.

5. X Castellsagué, N Muñoz, P Pitisuttithum, D Ferris, J

Monsonogo, K Ault, J Luna, E Myers, S Mallery, O M Bautista,

J Bryan, S Vuocolo, R M Haupt and A Saah. End-of-study safety, immunogenicity, and efficacy of quadrivalent HPV (types 6, 11, 16, 18) recombinant vaccine in adult women 24-45 years of age. British Journal of Cancer. 2011(105):28-37.

6. Omer SB, Salmon DA, Orenstein WA, deHart MP, Halsey N. Vaccine refusal, mandatory immunization, and the risks of vaccine-preventable diseases. N Engl J Med. 2009 05/07; 2012/08;360(19):1981-8.

7. Chen, Robert T, MD, MA', 'Hibbs, Beth. Pediatric Annals. Vaccine safety: Current and future challenges. Pediatric Annals. 1998;27(7):445-55.

8. Why it's important to monitor vaccine safety [homepage on the Internet]. Available from:

[http://www.cdc.gov/vaccinesafety/Vaccine\\_Monitoring/Index.html](http://www.cdc.gov/vaccinesafety/Vaccine_Monitoring/Index.html).

9. Vaccine safety [homepage on the Internet]. 2012 June 19, 2012.

Available from:

[http://www.cdc.gov/vaccinesafety/Vaccines/HPV/hpv\\_faqs.html](http://www.cdc.gov/vaccinesafety/Vaccines/HPV/hpv_faqs.html)

.

10. Widdice LE, Brown DR, Bernstein DI, et al. PRevalence of human papillomavirus infection in young women receiving the first quadrivalent vaccine dose. Arch Pediat Adol Med August 1. 2012;166(8):774-6.
